# Supplementary material for: Novel hydrogel pore-filled composite membranes with tunable and temperature-responsive size-selectivity
Source: Royal Society of Chemistry journal article supplement (doi:10.1039/c2jm15022k), 2012-01-01
Supplement: c2jm15022k.pdf [file c2jm15022k.pdf]

## Supporting information

Manuscript ID JM-ART-10-2011-015022

**Title: Novel hydrogel pore-filled composite membranes with tunable and temperature-responsive size-selectivity**

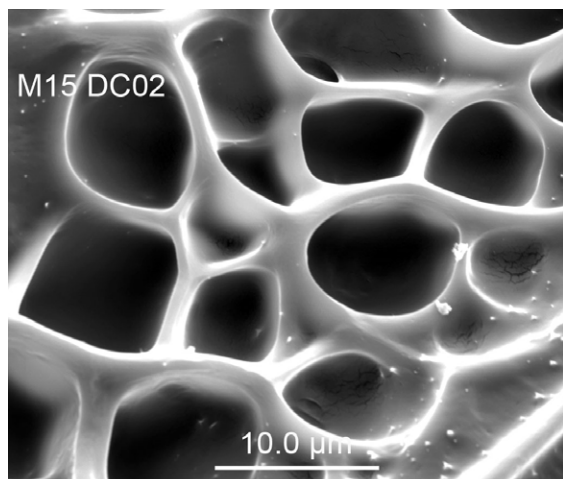

**Fig. A** SEM micrograph of swollen hydrogel after freeze-drying. Hydrogel composition was 15 wt% of NIPAAm and 2 wt% of MBAAm relative to NIPAAm (M15 DC02).

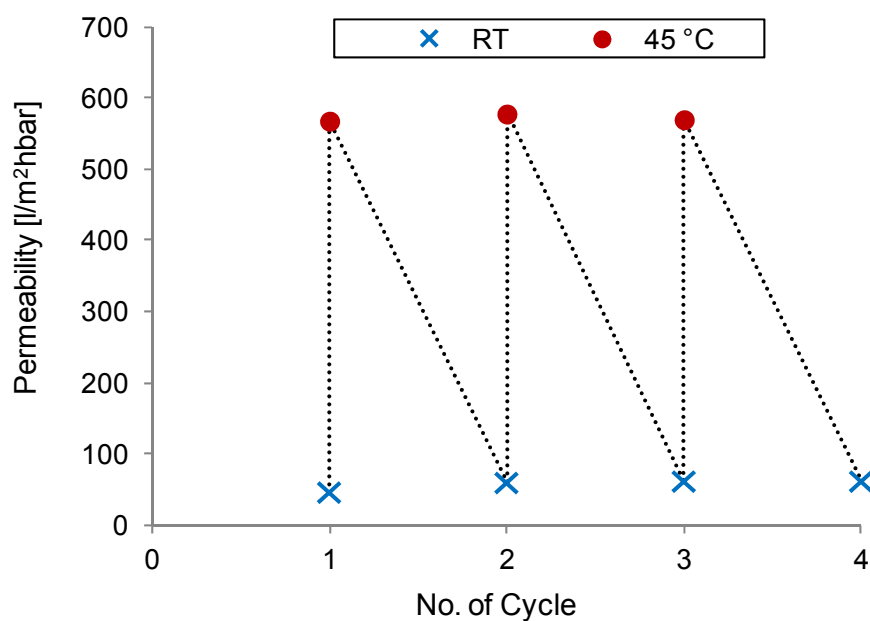

**Fig. B** Reversible temperature responsivity of water permeability for HPFCM prepared with base membrane 1000 nm.
